# Supplementary material
Source: Elsevier journal article supplement (https://www.sciencedirect.com/science/article/pii/S1134009621000553)
Supplement: mmc1 [file S1134009621000553:mmc1.doc]

**ANEXO I**

Cuestionario enviado a los servicios de Cirugía cardiovascular para elaborar el registro de intervenciones de la SECCE

1. **CARDIOPATÍAS ADQUIRIDAS CON CIRCULACIÓN EXTRACORPÓREA**

1.1 VALVULARES AISLADOS CON CEC

1.1.1 *Válvula aislada*

- Sustitución Aórtica
- Sustitución Mitral
- Sustitución Tricúspide
- Sustitución Pulmonar
- Aórtica Reparación
- Mitral Reparación
- Tricúspide Reparación
- Pulmonar Reparación

1.1.2 *Dos o más válvulas*

- Sustitución de dos válvulas
- Sustitución de una válvula y reparación de otra
- Reparación de dos válvulas
- Cirugía Sobre tres o más válvulas

1.1.3 *Valvulares + revascularización*

- Prótesis aórtica + Derivación coronaria
- Plastia aórtica + Derivación coronaria
- Prótesis Mitral + Derivación coronaria
- Plastia mitral + Derivación coronaria
- Dos o más válvulas + Derivación coronaria

1.1.4 *Tipo de prótesis utilizadas*

- Prótesis mecánicas
- Prótesis biológicas convencionales
- Prótesis biológicas de despliegue rápido (excluyendo TAVI)
- Anillos protésicos
- Homoinjertos
- Prótesis vasculares con válvula mecánica
- Prótesis vascular con válvula biológica

1.2 CIRUGIA CORONARIA CON CEC

1.2.1 *Cirugía de revascularización aislada*

- Una derivación
- Dos derivaciones
- Tres o más derivaciones
- Pacientes con un injerto arterial
- Pacientes con más de un injerto arterial

1.2.2 *Cirugía complicaciones mecánicas del infarto* *agudo de miocardio*

- Aneurisma ventricular con o sin revascularización
- Comunicación interventricular con o sin revascularización
- Ruptura cardíaca con o sin revascularización
- Insuficiencia mitral aguda con o sin revascularización

1.3 CIRUGIA DE LA AORTA CON CEC

1.3.1 *Cirugía de la aorta electiva*

- Sustitución aorta ascendente sin sustitución valvular aórtica (suprasinusal)
- Sustitución aorta ascendente con reparación valvular aórtica (suprasinusal + reparación)
- Sustitución aorta ascendente con sustitución valvular aórtica (suprasinusal + prótesis mecánica)
- Sustitución aorta ascendente con sustitución valvular aórtica (suprasinusal + prótesis biológica)
- Reemplazo de raíz aórtica (Bono-Bentall mecánico)
- Reemplazo de raíz aórtica (Bono-Bentall biológica)
- Sustitución arco aórtico aislado
- Sustitución parcial de arco aórtico y/o asociada a otros segmentos
- Sustitución aorta descendente
- Remodelado de raíz aórtica (Yacoub y variantes)
- Reimplantación de raíz aórtica (David y variantes)
- Intervención tipo Ross (y variantes)
- Aneurisma de aorta torácica descendente abierto con CEC
- Aneurisma toracoabdominal con CEC
- Cirugía de la aorta torácica asociada a revascularización miocárdica
- Cirugía de la aorta torácica asociada a otra valvulopatía

1.3.2 *Síndrome aórtico agudo*

- Disección Tipo A
- Disección Tipo B
- Ruptura traumática aorta torácica

1.4 OTROS PROCEDIMIENTOS CON CEC (MISCELANEA)

- Trasplante cardíaco
- Trasplante cardiopulmonar
- Cirugía arritmias con CEC No asociados a otros procedimientos
- Tumores cardíacos
- Implantación asistencia ventricular con

CEC

- Cirugía de arritmias asociado o no a otro procedimiento
- Otros

1.5 OTROS ASPECTOS

- - Toracotomías / Esternotomías mini-invasivas utilizadas
  - Revascularización con Láser asociado o no a derivación
  - Técnica Port-Access

1. **CIRUGIA CONGENITOS CON CEC**
   - Comunicación interauricular
   - Drenaje venoso pulmonar anómalo +/-Comunicación interauricular
   - Drenaje Venoso pulmonar anómalo total
   - Comunicación interventricular (incluye doble salida del ventrículo derecho sin estenosis pulmonar)
   - Defecto parcial del septo aurículoventricular (ostium primum y transicional)
   - Defecto completo del septo aurículoventricular
   - Tetralogía de Fallot o situación Fallot (incluye atresia pulmonar +CIV y doble salida del ventrículo derecho tipo Fallot)
   - Atresia pulmonar + CIV + grandes colaterales aortopulmonares
   - Trasposición de grandes arterias con septo intacto
   - Trasposición de grandes arterias compleja (asociada a CIV y/o arco y/o estenosis pulmonar)
   - Truncus arterioso
   - Estenosis aórtica discreta subvalvular (Membrana; Miomectomía)
   - Estenosis aórtica supravalvular
   - Sustitución valvular aórtica
   - Plastia valvular aórtica
   - Reemplazo de raíz aórtica (Ross y Ross-Konno)
   - Reemplazo de raíz aórtica (Bentall, Bentall-Konno)
   - Técnicas de remodelado y reemplazo de raíz (Yacoub, David y variantes)

- Sustitución valvular mitral
- Plastia valvular mitral
- Sustitución valvular tricuspídea
- Plastia valvular tricuspídea aislada
- Válvula pulmonar plastia
- Válvula pulmonar sustitución
- Procedimientos sobre dos válvulas
- Procedimientos sobre tres o más válvulas
- Glenn
- Fontan y variantes
- Conversión de Fontan
- Cirugía arco aórtico (interrupción, hipoplasia)
- Arteria coronaria izquierda anómala saliendo del tronco pulmonar y anomalías coronarias
- Fístula sistémico pulmonar con CEC
- Norwood y variantes para el corazón izquierdo hipoplásico
- Trasplante cardíaco
- Trasplante cardiopulmonar
- Otros con CEC
- Pacientes congénitos menores de 1 mes con CEC
- Pacientes congénitos mayores de 18 años con CEC

3.**CIRUGÍA SIN CIRCULACIÓN EXTRACORPÓREA**

3.1 CORONARIOS

- Una derivación
- Dos derivaciones
- Tres o más derivaciones
- Pacientes con un injerto arterial
- Pacientes con más de un injerto arterial

3.2 CONGENITOS

- Fistulas sistémico-pulmonares
- Cerclaje de arteria pulmonar
- Coartación de aorta
- Ductus <2,5 kg
- Ductus >2,5 kg
- Reparación de anillo vascular
- Otros
- Pacientes congénitos menores de 1 mes sin

CEC

- Pacientes congénitos mayores de 18 años sin CEC

3.3 OTRO TIPO DE PROCEDIMIENTOS (MISCELANEA)

- - Implantación de marcapasos
  - Cambio generador marcapasos
  - Implantación desfibrilador
  - Cambio generador desfibrilador
  - Ventana Pericárdica/Pericardiocentesis
  - Pericardiectomía
  - Reoperaciones por sangrado
  - Reintervenciones por mediastinitis
  - Reintervenciones por dehiscencia esternal
  - Asistencia ventricular sin CEC
  - Rotura de pared libre postinfarto sin CEC con o sin revascularización
  - ECMO
  - Válvula transcatéter vía apical
  - Válvula transcatéter vía femoral o vascular
  - Otros

1. **CIRUGÍA VASCULAR PERIFERICA**

4.1 CIRUGÍA ARTERIAL

- Cirugía de revascularización del sector aorto-ilíaco
- Cirugía de revascularización del sector femoropoplíteo y distal
- Combinaciones
- Cirugía troncos supra-aórticos
- Simpatectomía lumbar

4.2 ANEURISMAS

- Aneurisma aorta torácica abiertos sin CEC
- Aneurisma de aorta torácica con endoprótesis
- Aneurisma toracoabdominal abiertos sin

CEC

- Aneurisma de aorta toracoabdominal o

yuxtarrenal con endoprótesis

- Aneurisma aorta abdominal abiertos
- Aneurisma de aorta abdominal con endoprótesis
- Aneurisma arterias periféricas

4.3 OTROS

- - Cirugía venosa
  - Amputaciones
  - Fístulas AV
  - Embolectomía
  - Trauma arterial
  - Otros
  - Combinaciones anteriores

1. **ACTIVIDAD ANUAL POR CIRUJANO / AÑO**

5.1 Número de intervenciones cirugía cardíaca mayor. Staff

- Staff 1, Staff2, Staff 3, Staff 4, Staff 5, Staff 6, Staff 7, Staff 8, Staff 9, Staff 10
- Número de Staffs en el servicio

5.2 Número de intervenciones cirugía cardíaca mayor. Residente

- Residente 5º año, 4º año, 3º año, 2º año, 1º año
- Otros residentes o becarios
- Número de residentes/becarios en el servicio

5.3 DEMANDAS JUDICIALES

- Demandas civiles en 2019
- Demandas penales en 2019

**ANEXO II.**

RELACIÓN DE HOSPITALES QUE ENVIARON SUS DATOS AL REGISTRO DE LA SECTCV DURANTE EL PERIODO 2012-2019.

1. **Hospital General Universitario de Valencia.** Valencia.
2. **Grupo Cardiovascular**. Málaga
3. **Hospital Universitario Gregorio Marañón (Infantil).** Madrid.
4. **Hospital Universitario Ramón y Cajal (Infantil).** Madrid.
5. **Hospital Universitario La Paz (Infantil).** Madrid.
6. **Hospital Clínico Universitario de Santiago.** A Coruña.
7. **Complejo Hospitalario de Navarra.** Navarra.
8. **Hospital Universitario Central de Asturias.** Oviedo. Asturias.
9. **Hospital Universitario Virgen de la Victoria.** Málaga.
10. **Hospital Universitario Infanta Cristina.** Badajoz.
11. **Hospital Universitario Virgen de la Arrixaca (Adultos e Infantil).** Murcia.
12. **Hospital Universitario de Canarias.** La Laguna. Sta. Cruz de Tenerife.
13. **Hospital Universitari Germans Trias i Pujol (Can Ruti).** Badalona. Barcelona
14. **Hospital Clínico Universitario de Valladolid.** Valladolid.
15. **Hospital Universitario Puerta del Mar.** Cádiz.
16. **Clínica Quirón salud.** Albacete
17. **Hospital Universitario La Paz (Adultos).** Madrid.
18. **Hospital Universitario La Fé (Infantil).** Valencia.
19. **Hospital Universitario Fundación Jiménez Díaz y Hospital Universitario Rey Juan Carlos.** Madrid.
20. **Hospital Universitario Son Espases.** Palma de Mallorca.
21. **Hospital Universitario La Fé (Adultos).** Valencia.
22. **Hospital Clínico Universitario de Salamanca.** Salamanca.
23. **Hospital de Bellvitge.** Hospitalet del Llobregat. Barcelona.
24. **Hospital Universitario de La Princesa.** Madrid.
25. **Policlínica Guipúzcoa.** San Sebastián. Guipúzcoa.
26. **Clínica Los Manzanos.** Logroño
27. **Hospital Universitario Clínico San Carlos.** Madrid.
28. **Hospital de Sant Pau.** Barcelona.
29. **Hospital Universitario Dr. Negrín.** Las Palmas de Gran Canaria
30. **Hospital Álvaro Cunqueiro.** Vigo. Pontevedra
31. **Hospital Materno Infantil Vall d’Hebrón (Infantil)**. Barcelona.
32. **Hospiten Rambla.** Santa Cruz de Tenerife.
33. **Complejo Hospitalario Universitario materno infantil de Las Palmas (Infantil).** Gran Canaria
34. **Hospital Vall d’Hebrón. (Adultos).** Barcelona.
35. **Hospital Universitario Marqués de Valdecilla.** Santander. Cantabria
36. **Hospital Clinic i Provincial.** Barcelona.
37. **Hospital Regional Universitario Carlos Haya (Adultos e Infantil).** Málaga.
38. **Hospital Universitario Puerta de Hierro-Majadahonda.** Madrid.
39. **Hospital neoláser cardiovascular.** Sevilla.
40. **Hospital Universitario Gregorio Marañón (Adultos).** Madrid.
41. **Hospital Universitario de León.** León.
42. **Hospital Universitario Miguel Servet (Adultos e Infantil).** Zaragoza.
43. **Hospital Universitario Virgen de la Macarena.** Sevilla.
44. **Complejo Hospitalario Universitario A Coruña (Adultos e Infantil).** A Coruña.
45. **Hospital Sant Joan de Déu (Infantil).** Barcelona.
46. **Hospital General de Alicante.** Alicante.
47. **Hospital Clínico.** Valencia.
48. **Hospital Ramón y Cajal. (Adultos).** Madrid.
49. **Hospital 12 de Octubre (Adultos).** Madrid.
50. **Policlínica Miramar.** Palma de Mallorca.
51. **Hospital universitario de Cruces (Adultos e Infantil).** Baracaldo. Vizcaya.
52. **Hospital de Basurto.** Bilbao**.** Vizcaya.
53. **Hospital del Vinalopó.** Alicante.
54. **Complejo Hospitalario de Toledo.** Toledo.
55. **Hospital Casa de Salud.** Valencia.
56. **Hospital de la Ribera.** Alzira. Valencia.
57. **Hospital 12 de Octubre. (Infantil).** Madrid.
58. **Hospital Universitario Virgen de las Nieves (Adultos e Infantil).** Granada.
59. **Hospital Universitario Virgen del Rocío (Adultos e Infantil).** Sevilla.
60. **Hospital Quirón.** Tenerife
61. **Cardiofast.** Madrid
62. **Clínica Universidad de Navarra.** Pamplona. Navarra.
63. **Hospital Universitario Reina Sofía (Adultos e Infantil).** Córdoba.
64. **Hospital General de Cataluña.** Sant Cugat. Barcelona.
65. **Hospital Universitario Quirón salud.** Madrid.
66. **Hospital Modelo.** La Coruña.

**Anexo-III**: Cirugía de las cardiopatías congénitas con circulación extracorpórea en 2019.

|  | CONGENITOS CON CEC |  |  | Casos |  |  | éxitus |  |  | % éxitus |  |  | Aristóteles |  |  | % éxitus |  |  |
| --- | --- | --- | --- | --- | --- | --- | --- | --- | --- | --- | --- | --- | --- | --- | --- | --- | --- | --- |
|  |  |  |  |  |  |  | observado |  |  | Básico |  |  | esperado* |  |  |
|  |  |  |  |  |  |  |  |  |  |  |  |  |  |  |  |
|  |  |  |  |  |  |  |  |  |  |  |  |  |  |  |  |  |  |  |
|  | CIA |  | 290 | |  | 2 | |  | 0,69 % | |  | 3,01 | |  | <1 % | |  |  |
|  |  |  |  |  |  |  |  |  |
|  | Drenaje venoso pulmonar anómalo +/- CIA |  | 56 | |  | 1 | |  | 1,78 % | |  | 5,6 | |  | 5-10 % | |  |  |
|  |  |  |  |  |  |  |  |  |
|  | Drenaje Venoso pulmonar anómalo total |  | 25 | |  | 1 | |  | 4 % | |  | 9,27 | |  | 5-10 % | |  |  |
|  |  |  |  |  |  |  |  |  |
|  | CIV (incluye DSVD sin EP) |  | 186 | |  | 2 | |  | 1,07 % | |  | 6,79 | |  | 5-10 % | |  |  |
|  |  |  |  |  |  |  |  |  |
|  | DPSAV (ostium primum y transicional) |  | 39 | |  | 0 | |  | 0 % | |  | 4,93 | |  | 1-5 % | |  |  |
|  |  |  |  |  |  |  |  |  |
|  | Defecto completo del Septo auriculoventricular |  | 38 | |  | 0 | |  | 0 % | |  | 9,11 | |  | 5-10 % | |  |  |
|  |  |  |  |  |  |  |  |  |
|  | T.Fallot o situación Fallot (Incluye AP+CIV y |  |  |  |  |  |  |  |  |  |  |  |  |  |  |  |  |  |
|  | DSVD tipo Fallot) |  | 133 | |  | 2 | |  | 1,5 % | |  | 8,63 | |  | 5-10 % | |  |  |
|  |  |  |  |  |  |  |  |  |
|  | Atresia pulmonar+CIV+MAPCAS |  | 17 | |  | 0 | |  | 0 % | |  | 9,89 | |  | 5-10 % | |  |  |
|  |  |  |  |  |  |  |  |  |
|  | D-TGA con septo intacto |  | 49 | |  | 5 | |  | 10,2 % | |  | 9,89 | |  | 5-10 % | |  |  |
|  |  |  |  |  |  |  |  |  |
|  | D-TGA compleja (asociada a CIV y/o arco y/o EP) |  | 17 | |  | 0 | |  | 0 % | |  | 11,56 | |  | 10-20 % | |  |  |
|  |  |  |  |  |  |  |  |  |
|  | Truncus arterioso |  | 4 | |  | 0 | |  | 0 % | |  | 10,5 | |  | 10-20 % | |  |  |
|  |  |  |  |  |  |  |  |  |
|  | Estenosis aórtica discreta subvalvular |  |  |  |  |  |  |  |  |  |  |  |  |  |  |  |  |  |
|  | (Membrana; Miomectomía) |  | 75 | |  | 0 | |  | 0 % | |  | 6,31 | |  | 5-10 % | |  |  |
|  |  |  |  |  |  |  |  |  |
|  | Estenosis aórtica supravalvular |  | 11 | |  | 0 | |  | 0 % | |  | 7,31 | |  | 5-10 % | |  |  |
|  |  |  |  |  |  |  |  |  |
|  | Sustitución valvular aórtica |  | 37 | |  | 0 | |  | 0 % | |  | 8 | |  | 5-10 % | |  |  |
|  |  |  |  |  |  |  |  |  |
|  | Plastia valvular aórtica |  | 31 | |  | 1 | |  | 3,22 % | |  | 8 | |  | 5-10 % | |  |  |
|  |  |  |  |  |  |  |  |  |
|  | Reemplazo de raíz aórtica (Ross y Ross-Konno) |  | 27 | |  | 1 | |  | 3,7 % | |  | 11,41 | |  | 10-20 % | |  |  |
|  |  |  |  |  |  |  |  |  |
|  | Reemplazo de raíz aórtica (Bentall y Bentall-Konno) |  | 18 | |  | 0 | |  | 0 % | |  | 9,52 | |  | 5-10 % | |  |  |
|  |  |  |  |  |  |  |  |  |
|  | Técnicas de remodelado y reemplazo de raíz |  |  |  |  |  |  |  |  |  |  |  |  |  |  |  |  |  |
|  | (Yacoub, David y variantes) |  | 8 | |  | 0 | |  | 0 % | |  | 9,3 | |  | 5-10 % | |  |  |
|  | Sustitución valvular mitral |  | 35 | |  | 1 | |  | 2,85 % | |  | 7,5 | |  | 5-10 % | |  |  |
|  |  |  |  |  |  |  |  |  |
|  | Plastia valvular mitral |  | 31 | |  | 0 | |  | 0 % | |  | 8,23 | |  | 5-10 % | |  |  |
|  |  |  |  |  |  |  |  |  |
|  | Sustitución valvular tricuspídea |  | 9 | |  | 0 | |  | 0 % | |  | 7,5 | |  | 5-10 % | |  |  |
|  |  |  |  |  |  |  |  |  |
|  | Plastia valvular tricuspídea aislada |  | 15 | |  | 0 | |  | 0 % | |  | 7,44 | |  | 5-10 % | |  |  |
|  |  |  |  |  |  |  |  |  |
|  | Válvula pulmonar plastia |  | 19 | |  | 0 | |  | 0 % | |  | 6,51 | |  | 5-10 % | |  |  |
|  |  |  |  |  |  |  |  |  |
|  | Válvula pulmonar sustitución |  | 66 | |  | 0 | |  | 0 % | |  | 6,94 | |  | 5-10 % | |  |  |
|  |  |  |  |  |  |  |  |  |
|  | Procedimientos sobre dos válvulas |  | 30 | |  | 1 | |  | 3,33 % | |  | 8,12 | |  | 5-10 % | |  |  |
|  |  |  |  |  |  |  |  |  |
|  | Procedimientos sobre tres o más válvulas |  | 2 | |  | 0 | |  | 0 % | |  | 9 | |  | 5-10 % | |  |  |
|  | Glenn |  | 25 | |  | 0 | |  | 0 % | |  | 7,22 | |  | 5-10 % | |  |  |
|  |  |  |  |  |  |  |  |  |

| Fontan y variantes | 29 | 0 | 0 % | 9,2 | 5-10 % |  |
| --- | --- | --- | --- | --- | --- | --- |
|  |  |
| Conversión de Fontan | 0 |  |  |  |  |  |
| Cirugía arco aórtico (interrupción, hipoplasia) | 42 | 3 | 7,14 % | 9,79 | 5-10 % |  |
|  |  |
| ALCAPA y anomalías coronarias | 13 | 0 | 0 % | 10 | 5-10 % |  |
|  |  |
| Fístula sistémico pulmonar con CEC | 22 | 2 | 9,09 % | 7,44 | 5-10 % |  |
|  |  |
| Norwood y variantes corazón izquierdo hipoplásico | 17 | 7 | 41,18 % | 13,85 | >20 % |  |
|  |  |
| Trasplante cardíaco | 31 | 6 | 19,35 % | 10,17 | 10-20 % |  |
|  |  |
| Trasplante cardiopulmonar | 0 |  |  |  |  |  |
| Otros con CEC | 108 | 5 | 4,63 % | 8,35 | 5-10 % |  |
|  |  |
| TOTAL CONGÉNITOS CON CEC | 1555 | 40 | 2,57 % | 7,4,78** | 1-5 % |  |
|  |  |  |  |  |  |  |
| *Pacientes congénitos menores de 1 mes con CEC* | 221 | 19 | 8,59 % | 9,65 | 5-10 % |  |
|  |  |
| *Pacientes congénitos mayores de 18 años con CEC* | 422 | 6 | 1,42% | 4,54 | 1-5 % |  |
|  |  |

CIA: comunicación interauricular, CIV: comunicación interventricular, DSVD: doble salida del ventrículo

derecho, EP: estenosis pulmonar, DPSAV: defecto parcial del septo auriculoventricular, T. Fallot:

tetralogía de Fallot, AP: atresia pulmonar, MAPCAS: colaterales aorto-pulmonares mayores, D-TGA: D-

trasposición de grandes arterias, ALCAPA: arteria coronaria anómala saliendo de la arteria pulmonar,

CEC: circulación extracorpórea

*Rango de mortalidad esperada según escala de Aristóteles básico por grupos de patología.

**Media ponderada de la clasificación del riesgo según escala de Aristóteles básico para el total de cirugía congénita con CEC.

**Anexo-IV:** Cirugía de las cardiopatías congénitas sin circulación extracorpórea en 2019.

|  | CONGENITOS SIN CEC |  |  | Casos |  |  | Nº éxitus |  |  | % éxitus |  |  | Aristóteles |  |  | % éxitus |  |  |
| --- | --- | --- | --- | --- | --- | --- | --- | --- | --- | --- | --- | --- | --- | --- | --- | --- | --- | --- |
|  |  |  |  |  |  |  | observado |  |  | Básico |  |  | esperado* |  |  |
|  |  |  |  |  |  |  |  |  |  |  |  |  |  |  |  |
|  |  |  |  |  |  |  |  |  |  |  |  |  |  |  |  |  |  |  |
|  | Fístulas sistémico-pulmonares |  | 21 | |  | 4 | |  | 19,05 % | |  | 4,9 | |  | 5-10 % | |  |  |
|  |  |  |  |  |  |  |  |  |
|  | Banding arteria pulmonar |  | 28 | |  | 3 | |  | 10,7 % | |  | 4,77 | |  | 5-10 % | |  |  |
|  |  |  |  |  |  |  |  |  |
|  | Coartación de aorta |  | 91 | |  | 0 | |  | 0 % | |  | 6,61 | |  | 5-10 % | |  |  |
|  |  |  |  |  |  |  |  |  |
|  | Ductus <2,5 kg |  | 73 | |  | 0 | |  | 0 % | |  | 3 | |  | <1 % | |  |  |
|  |  |  |  |  |  |  |  |  |
|  | Ductus >2,5 kg |  | 11 | |  | 0 | |  | 0 % | |  | 3,45 | |  | <1 % | |  |  |
|  |  |  |  |  |  |  |  |  |
|  | Reparación de anillo vascular |  | 29 | |  | 0 | |  | 0 % | |  | 4,78 | |  | 1-5 % | |  |  |
|  | Otros |  | 60 | |  | 0 | |  | 0 % | |  | 3,7 | |  | 1-5 % | |  |  |
|  | TOTAL CONGENITOS SIN CEC | | 313 | |  | 7 | |  | 2,23 % | |  | 5,42** | |  | 5-10 % | |  |  |
|  |  | |  |  |  |  |  |  |  |  |  |  |  |  |  |  |  |  |
|  | *Pacientes congénitos menores de 1* | | 183 | |  | 2 | |  | 1,09 % | |  | 4,17 | |  | 1-5% | |  |  |
|  | *mes sin CEC* | |  |  |  |  |  |  |
|  |  |  |  |  |  |  |  |  |  |  |  |  |  |  |  |  |
|  |  | |  |  |  |  |  |  |  |  |  |  |  |  |  |  |  |  |
|  | *Pacientes congénitos mayores de* | | 95 | |  | 0 | |  | 0 % | |  | 2 | |  | 1-5% | |  |  |
|  | *18 años sin CEC* | |  |  |  |  |  |  |
|  |  |  |  |  |  |  |  |  |  |  |  |  |  |  |  |  |
|  |  |  |  |  |  |  |  |  |  |  |  |  |  |  |  |  |  |  |

*Rango de mortalidad esperada según escala de Aristóteles por grupos de patología.

**Media ponderada de la clasificación del riesgo según escala de Aristóteles para total de cirugía congénita sin CEC.
