# Supplementary material
Source: Elsevier journal article supplement (https://www.sciencedirect.com/science/article/pii/S1134009621000553)
Supplement: mmc4 [file S1134009621000553:mmc4.doc]

**Anexo-IV:** Cirugía de las cardiopatías congénitas sin circulación extracorpórea en 2019.

|  | CONGENITOS SIN CEC |  |  | Casos |  |  | Nº éxitus |  |  | % éxitus |  |  | Aristóteles |  |  | % éxitus |  |  |
| --- | --- | --- | --- | --- | --- | --- | --- | --- | --- | --- | --- | --- | --- | --- | --- | --- | --- | --- |
|  |  |  |  |  |  |  | observado |  |  | Básico |  |  | esperado* |  |  |
|  |  |  |  |  |  |  |  |  |  |  |  |  |  |  |  |
|  |  |  |  |  |  |  |  |  |  |  |  |  |  |  |  |  |  |  |
|  | Fístulas sistémico-pulmonares |  | 21 | |  | 4 | |  | 19,05 % | |  | 4,9 | |  | 5-10 % | |  |  |
|  |  |  |  |  |  |  |  |  |
|  | Banding arteria pulmonar |  | 28 | |  | 3 | |  | 10,7 % | |  | 4,77 | |  | 5-10 % | |  |  |
|  |  |  |  |  |  |  |  |  |
|  | Coartación de aorta |  | 91 | |  | 0 | |  | 0 % | |  | 6,61 | |  | 5-10 % | |  |  |
|  |  |  |  |  |  |  |  |  |
|  | Ductus <2,5 kg |  | 73 | |  | 0 | |  | 0 % | |  | 3 | |  | <1 % | |  |  |
|  |  |  |  |  |  |  |  |  |
|  | Ductus >2,5 kg |  | 11 | |  | 0 | |  | 0 % | |  | 3,45 | |  | <1 % | |  |  |
|  |  |  |  |  |  |  |  |  |
|  | Reparación de anillo vascular |  | 29 | |  | 0 | |  | 0 % | |  | 4,78 | |  | 1-5 % | |  |  |
|  | Otros |  | 60 | |  | 0 | |  | 0 % | |  | 3,7 | |  | 1-5 % | |  |  |
|  | TOTAL CONGENITOS SIN CEC | | 313 | |  | 7 | |  | 2,23 % | |  | 5,42** | |  | 5-10 % | |  |  |
|  |  | |  |  |  |  |  |  |  |  |  |  |  |  |  |  |  |  |
|  | *Pacientes congénitos menores de 1* | | 183 | |  | 2 | |  | 1,09 % | |  | 4,17 | |  | 1-5% | |  |  |
|  | *mes sin CEC* | |  |  |  |  |  |  |
|  |  |  |  |  |  |  |  |  |  |  |  |  |  |  |  |  |
|  |  | |  |  |  |  |  |  |  |  |  |  |  |  |  |  |  |  |
|  | *Pacientes congénitos mayores de* | | 95 | |  | 0 | |  | 0 % | |  | 2 | |  | 1-5% | |  |  |
|  | *18 años sin CEC* | |  |  |  |  |  |  |
|  |  |  |  |  |  |  |  |  |  |  |  |  |  |  |  |  |
|  |  |  |  |  |  |  |  |  |  |  |  |  |  |  |  |  |  |  |

*Rango de mortalidad esperada según escala de Aristóteles por grupos de patología.

**Media ponderada de la clasificación del riesgo según escala de Aristóteles para total de cirugía congénita sin CEC.
